# Supplementary material
Source: PubMed Central journal article supplement (PMC5913833)
Supplement: IAI.00943-17_zii999092394s1.pdf [file IAI.00943-17_zii999092394s1.pdf]

## SUPPLEMENTAL MATERIAL

### **Type IV pili promote *Clostridium difficile* adherence and persistence in a mouse model of infection**

Robert W. McKee, Naira Aleksanyan, Elizabeth M. Garrett, and Rita Tamayo

Table S1. Strains and cell lines used in this study

Table S2. Primers used in this study

Figure S1. Viability of epithelial cell lines under anaerobic conditions.

Figure S2. Growth of *C. difficile* strains in DMEM culture medium.

Figure S3. Swimming motility of 630 $\Delta$ erm and TFP mutants

Figure S4. Competition of R20291 and R20291 *pilB1::ermB* strains in the mouse model.

Table S1. Strains and plasmids used in this study.

| Strain/Plasmid                     | Description/Purpose                                                                                                                                                                                | Reference         |
|------------------------------------|----------------------------------------------------------------------------------------------------------------------------------------------------------------------------------------------------|-------------------|
| <b>Plasmids</b>                    |                                                                                                                                                                                                    |                   |
| pMC123                             | <i>E. coli</i> – <i>C. difficile</i> shuttle vector; Amp <sup>R</sup> , Cm <sup>R</sup> /Tm <sup>R</sup>                                                                                           | [1]               |
| pMC-P <sub>cpr</sub>               | pMC123 with <i>cpr</i> promoter in the multiple cloning site                                                                                                                                       | [2]               |
| pDccA                              | pMC-P <sub>cpr</sub> :: <i>dccA</i> (CD630_14200)                                                                                                                                                  | [2]               |
| pDccA <sup>mut</sup>               | pMC-P <sub>cpr</sub> :: <i>dccA</i> <sup>mut</sup> (AADEF)                                                                                                                                         | [2]               |
| pSigD                              | pMC-P <sub>cpr</sub> :: <i>sigD</i> (CD630_02660)                                                                                                                                                  | [3]               |
| pPilA1                             | <i>pilA1</i> complementation plasmid with native promoter and riboswitch, pMC-P <sub>pilA1</sub> -RB- <i>pilA1</i> (CD630_3513), abbreviated as pPilA1                                             | This study        |
| pPilA1 <sup>mut</sup>              | <i>pilA1</i> complementation plasmid with native promoter and riboswitch unable to bind c-di-GMP, pMC-P <sub>pilA1</sub> -RB <sup>A70G</sup> - <i>pilA1</i> , abbreviated as pPilA1 <sup>mut</sup> | This study        |
| <b><i>E. coli</i> strains</b>      |                                                                                                                                                                                                    |                   |
| DH5α                               | F- φ80 <i>lacZ</i> ΔM15 Δ( <i>lacZYA-argF</i> )U169 <i>recA1 endA1 hsdR17</i> (rκ -, mκ+) <i>phoA supE44 thi-1 gyrA96 relA1 λ- tonA</i>                                                            | Invitrogen<br>[4] |
| HB101                              | F- <i>mcrB mrr hsdS20</i> (rB- mB-) <i>recA13 leuB6 ara-14 proA2 lacY1 galK2 xyl-5 mtl-1 rpsL20</i>                                                                                                | [5]               |
| RT1026                             | HB101(pRK24) pPilA1                                                                                                                                                                                | This study        |
| RT1027                             | HB101(pRK24) pPilA1 <sup>mut</sup>                                                                                                                                                                 | This study        |
| <b><i>C. difficile</i> strains</b> |                                                                                                                                                                                                    |                   |
| 630Δerm                            | Ribotype 012, erythromycin-sensitive derivative of <i>C. difficile</i> 630                                                                                                                         | [6]               |
| R20291                             | Ribotype 027, epidemic isolate                                                                                                                                                                     | [7]               |
| RT761                              | 630Δerm <i>pilA1</i> :: <i>ermB</i>                                                                                                                                                                | [3]               |
| RT762                              | 630Δerm pMC-P <sub>cpr</sub>                                                                                                                                                                       | [3]               |
| RT763                              | 630Δerm pDccA                                                                                                                                                                                      | [3]               |
| RT764                              | 630Δerm pDccA <sup>mut</sup>                                                                                                                                                                       | [3]               |
| RT765                              | 630Δerm <i>pilB1</i> :: <i>ermB</i> , pMC-P <sub>cpr</sub>                                                                                                                                         | [3]               |
| RT766                              | 630Δerm <i>pilB1</i> :: <i>ermB</i> , pDccA                                                                                                                                                        | [3]               |
| RT767                              | 630Δerm <i>pilB1</i> :: <i>ermB</i> , pDccA <sup>mut</sup>                                                                                                                                         | [3]               |
| RT768                              | 630Δerm <i>pilA1</i> :: <i>ermB</i> , pMC-P <sub>cpr</sub>                                                                                                                                         | [3]               |
| RT769                              | 630Δerm <i>pilA1</i> :: <i>ermB</i> , pDccA                                                                                                                                                        | [3]               |
| RT770                              | 630Δerm <i>pilA1</i> :: <i>ermB</i> , pDccA <sup>mut</sup>                                                                                                                                         | [3]               |
| RT1075                             | 630Δerm <i>sigD</i> :: <i>ermB</i>                                                                                                                                                                 | [3]               |
| RT1138                             | 630Δerm <i>sigD</i> :: <i>ermB</i> pSigD                                                                                                                                                           | This study        |
| RT1136                             | 630Δerm <i>sigD</i> :: <i>ermB</i> pMC-P <sub>cpr</sub>                                                                                                                                            | [3]               |
| RT1265                             | 630Δerm <i>sigD</i> :: <i>ermB</i> pDccA                                                                                                                                                           | This study        |
| RT1266                             | 630Δerm <i>sigD</i> :: <i>ermB</i> pDccA <sup>mut</sup>                                                                                                                                            | This study        |
| RT1362                             | 630Δerm <i>pilA1</i> :: <i>ermB</i> pPilA1                                                                                                                                                         | This study        |
| RT1366                             | 630Δerm <i>pilA1</i> :: <i>ermB</i> pPilA1 <sup>mut</sup>                                                                                                                                          | This study        |
| <b>Eukaryotic cell lines</b>       |                                                                                                                                                                                                    |                   |
| Caco-2                             | Caco-2 (ATCC® HTB-37) human colorectal adenocarcinoma cells                                                                                                                                        | [8]               |
| HT-29                              | HT-29 (ATCC® HTB-38) human colorectal adenocarcinoma cells                                                                                                                                         | [9]               |
| MDCK                               | Madin-Darby Canine Kidney cells (ATCC® CCL-34)                                                                                                                                                     | [10]              |

Table S2. Primers used in this study.

| <b>Oligonucleotide</b> | <b>Sequence</b>                      |
|------------------------|--------------------------------------|
| R978                   | GACTGCAGCATTGATAATTGAACATTAAGAAAATAG |
| R1183                  | CCGAATTCAAATTCTGTTTCAATATGTAAAAAGTTG |
| R1184                  | CAATTCATAGCCGGCTGCACCACTAACTCAATA    |
| R1185                  | TATTGAGTTAGTGGTGCAGCCGGCTATGAAATTG   |

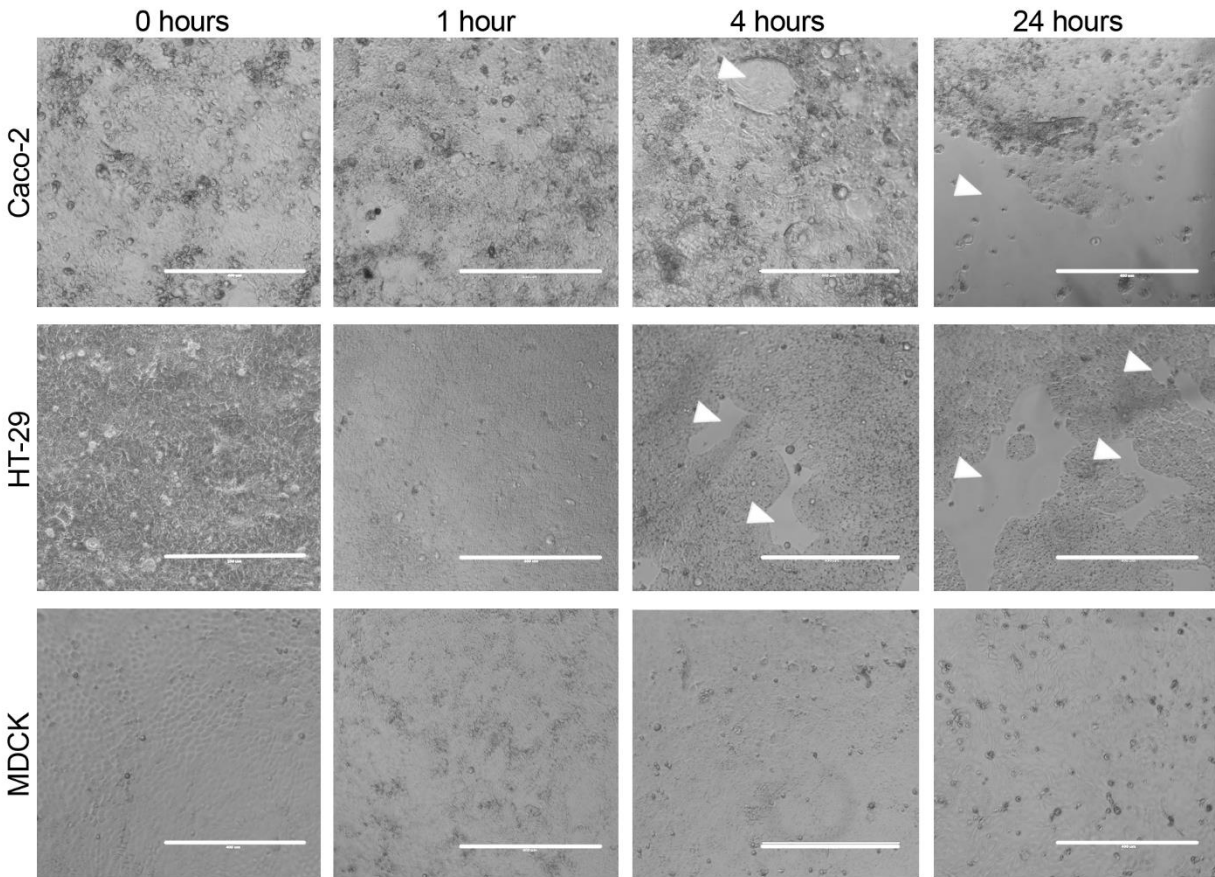

Figure S1. Viability of epithelial cell lines under anaerobic conditions. Monolayers of Caco-2, HT-29, and MDCK cells before and after incubation in anaerobic conditions for 1, 4 and 24 hours. Scale bar = 400  $\mu$ m. White arrows indicate gaps in monolayers.

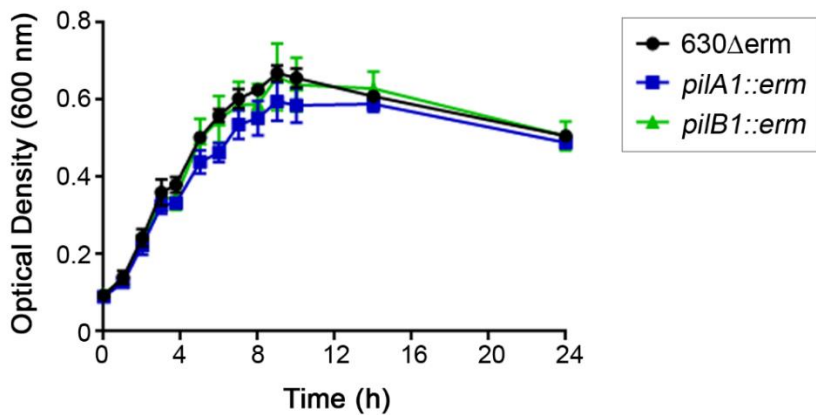

Figure S2. Growth of *C. difficile* strains in DMEM culture medium. 630 $\Delta$ Erm, the *pilA1* mutant, and *pilB1* mutant were grown in DMEM + 10% FBS without phenol red, with OD<sub>600</sub> measured over the indicated time frame.

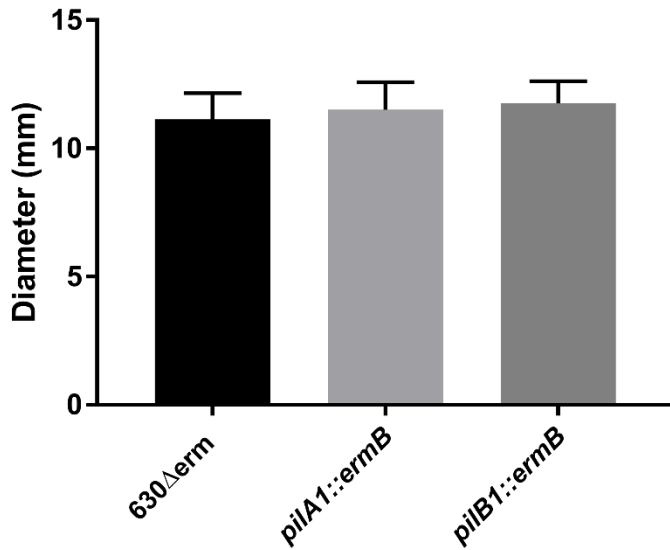

Figure S3. Swimming motility of 630Δerm and TFP mutants. Bacteria from individual colonies were inoculated into soft agar plates containing 0.5X BHIS and 0.3% agar and incubated at 37 °C under anaerobic conditions for 48 hours. Shown are the means and standard deviations of the diameters of the colony swarms from 4 biological replicates. Data were analyzed by one-way ANOVA; no significant differences were found.

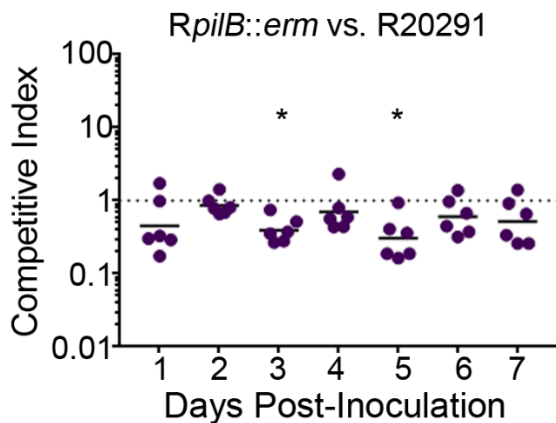

Figure S4. Competition of R20291 and R20291 *pilB1::ermB* strains in the mouse model. R20291 *pilB1::ermB* versus the R20291 parent strain were co-inoculated into antibiotic-treated C57BL/6 mice. CFU recovered from feces were used as a proxy for bacterial load in the intestine. Fecal samples were collected and homogenized at the indicated times post-inoculation and plated on TCCFA and TCCFA supplemented with lincomycin at 20 μg/ml to enumerate total CFU and mutant CFU, respectively. Competitive indices (CI) were calculated as detailed in the Materials and Methods. Symbols reflect CI from individual mice, bars indicate standard deviation. \* P < 0.05, Wilcoxon matched-pairs signed rank test.

## References

1. McBride, S.M., A. L. Sonenshein 2011. Identification of a genetic locus responsible for antimicrobial peptide resistance in *Clostridium difficile*. *Infect Immun*. 79(1):167–76.
2. Purcell, E. B., R. W. McKee, S. M. McBride, C. M. Waters, and R. Tamayo. 2012. Cyclic diguanylate inversely regulates motility and aggregation in *Clostridium difficile*. *J. Bacteriol*. 194:3307-3316. doi: 10.1128/JB.00100-12.
3. Bordeleau, E., E. B. Purcell, D. A. Lafontaine, L. C. Fortier, R. Tamayo, and V. Burrus. 2015. Cyclic di-GMP riboswitch-regulated type IV pili contribute to aggregation of *Clostridium difficile*. *J. Bacteriol*. 197:819-832. doi: 10.1128/JB.02340-14.
4. Hanahan, D. (1985) *DNA Cloning: A Practical Approach* (D. M. Glover, Ed.) pp 109, IRL Press, McLean, VA.
5. McBride, SM, A. L. Sonenshein. 2011. Identification of a genetic locus responsible for antimicrobial peptide resistance in *Clostridium difficile*. *Infect Immun* 79:167-176.
6. Hussain, H. A., A. P. Roberts, and P. Mullany. 2005. Generation of an erythromycin-sensitive derivative of *Clostridium difficile* strain 630 (630Deltaerm) and demonstration that the conjugative transposon Tn916DeltaE enters the genome of this strain at multiple sites. *J. Med. Microbiol*. 54:137-141.
7. Stabler, R. A., M. He, L. Dawson, M. Martin, E. Valiente, C. Corton, T. D. Lawley, M. Sebahia, M. A. Quail, G. Rose, D. N. Gerding, M. Gibert, M. R. Popoff, J. Parkhill, G. Dougan, and B. W. Wren. 2009. Comparative genome and phenotypic analysis of *Clostridium difficile* 027 strains provides insight into the evolution of a hypervirulent bacterium. *Genome Biol*. 10:R102. doi: 10.1186/gb-2009-10-9-r102.
8. Jumarie C, C. Malo. 1991. Caco-2 cells cultured in serum-free medium as a model for the study of enterocytic differentiation in vitro. *J. Cell. Physiol*. 149: 24-33
9. Lebowitz A., J.C. Stinson, W. B. McCombs 3<sup>rd</sup>, C. E. McCoy, K.C. Mazur, N.D. Mabry. 1976. Classification of Human Colorectal Adenocarcinoma Cell Lines. *Cancer Res*. Dec;36(12):4562-9.
10. Gaush, C.R., W.L. Hard, T.F. Smith. Characterization of an established line of canine kidney cells (MDCK). 1966. *Proc Soc Exp Biol Med*. Jul;122(3):931-5.
